# Supplementary material for: Lrig1- and Wnt-dependent niches dictate segregation of resident immune cells and melanocytes in murine tail epidermis
Source: PubMed Central journal article supplement (PMC9382897; doi:10.1242/dev.200154), 2022-07-14
Supplement: develop-149-200154-s1.pdf [file develop-149-200154-s1.pdf]

## Baess et al. Figure S1

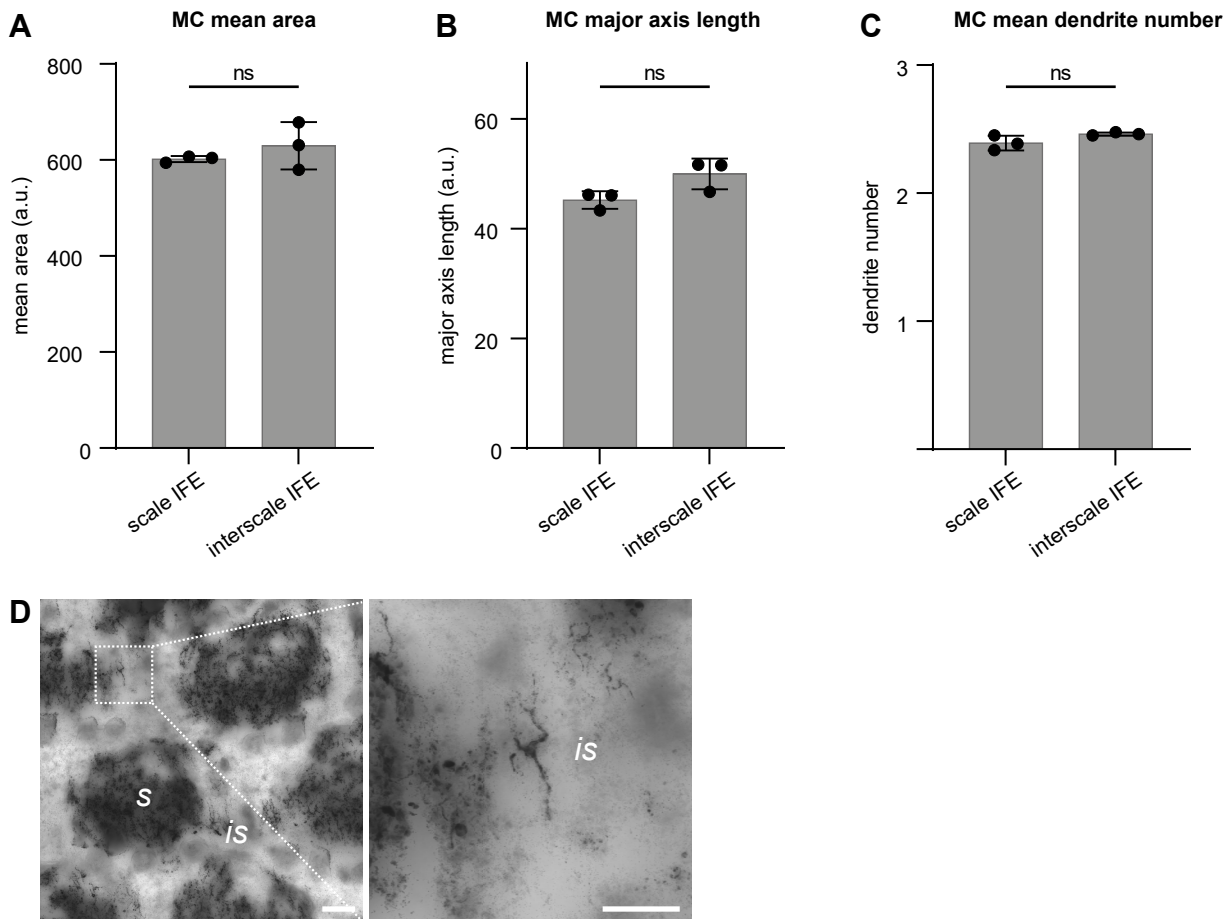

**Fig. S1. Interscale IFE contains a small MC population with morphological features similar to their scale-based counterparts and capable of melanin production.** (A) Quantification of mean area per MC in 3-months old wild-type C57BL/6 scale and interscale tail IFE.  $n=3$ ; ns:  $p=0.7000$ ;  $\text{mean}\pm\text{s.d.}$ ; Mann-Whitney test. (B) Quantification of major axis length per MC in 3-months old C57BL/6 scale and interscale tail IFE.  $n=3$ ; ns:  $p=0.1000$ ;  $\text{mean}\pm\text{s.d.}$ ; Mann-Whitney test. (C) Quantification of dendrite numbers per MC in 3-months old C57BL/6 scale and interscale tail IFE.  $n=3$ ; ns:  $p=0.2000$ ;  $\text{mean}\pm\text{s.d.}$ ; Mann-Whitney test. (D) Representative images of Fontana-Masson staining in tail epidermis whole-mounts of 3-months old C57BL/6 mice. Representative for  $n=3$ . Scale bars: 100  $\mu$ m (right), 50  $\mu$ m (left). s: scale, is: interscale.

Baess et al. Figure S2

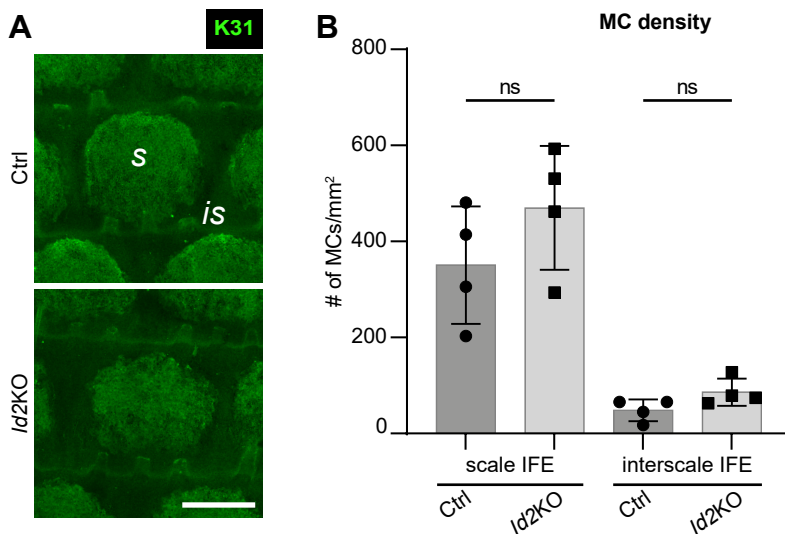

**Fig. S2. Epidermal scale differentiation and MC densities are unaffected by deletion of transcription factor *Id2*.** (A) K31 immunostaining of tail epidermis whole-mounts of 3-months old control and *Id2KO* mice. Representative for n=4. Scale bar: 250  $\mu$ m. (B) Quantification of 3A; MC cell numbers per scale:interscale unit (MCs/mm<sup>2</sup>) in tail epidermis from 3-months old control and *Id2KO* mice. n=4; ns: p=0.2962 (scale IFE, Ctrl vs. *Id2KO*); ns: p=0.9343 (interscale IFE, Ctrl vs. *Id2KO*); mean $\pm$ s.d.; one-way ANOVA/Tukey's multiple comparisons test. s: scale, is: interscale.



## Baess et al. Figure S3

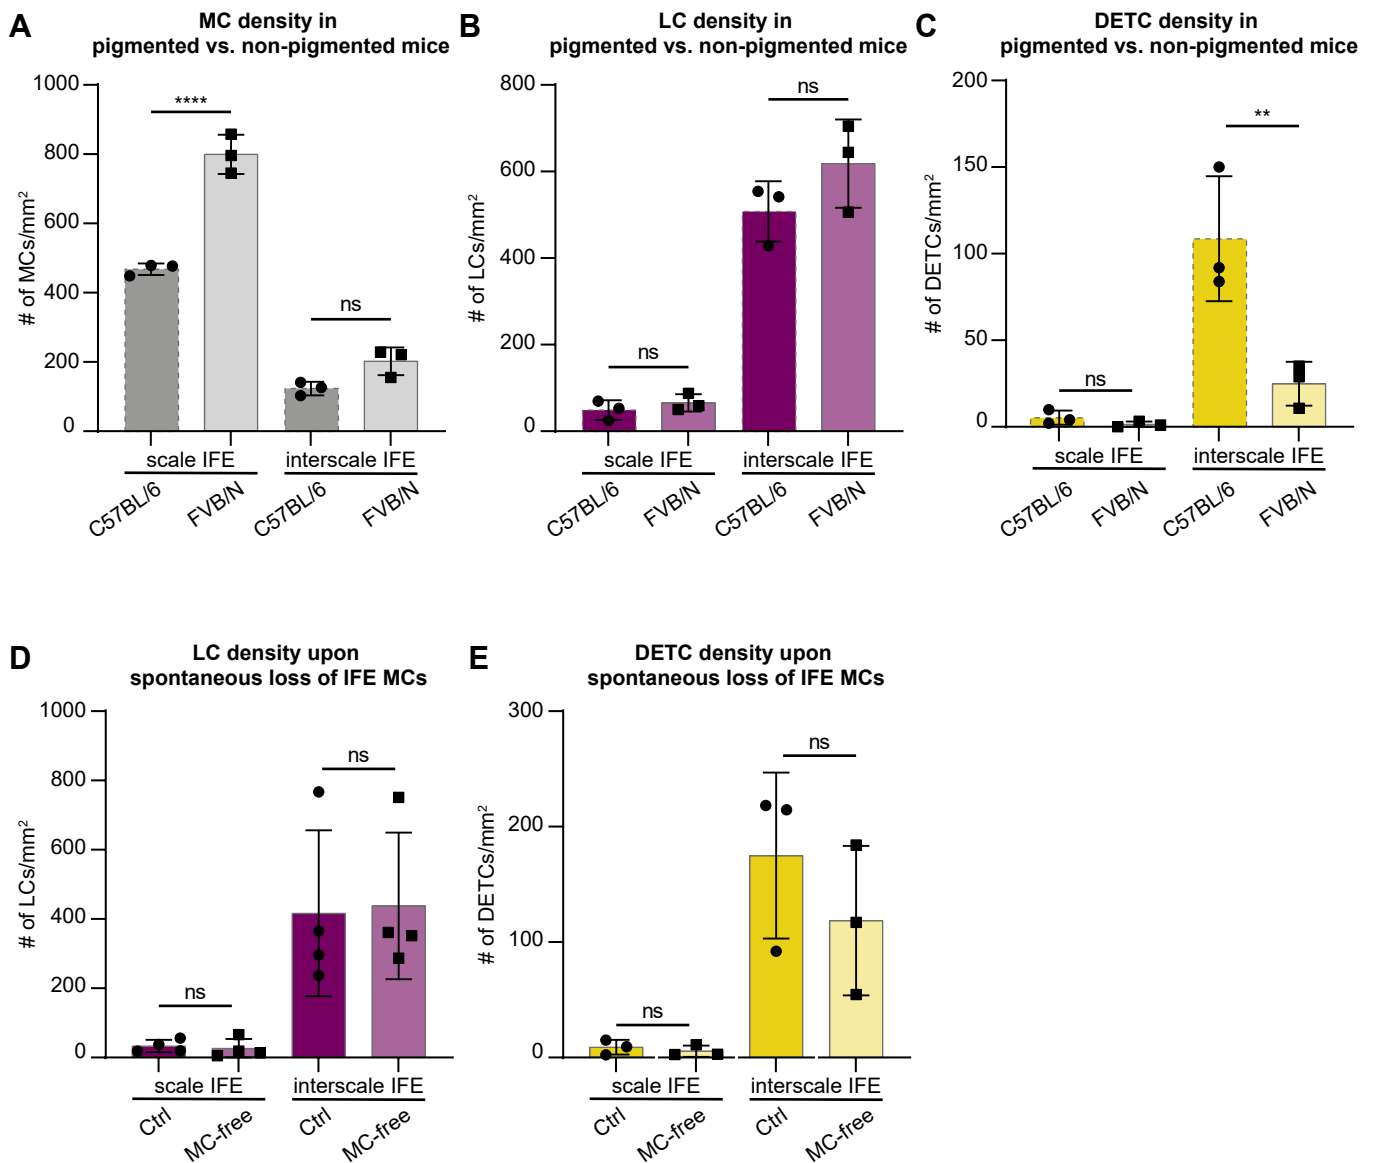

**Fig. S3. Epidermis-resident cell types in non-pigmented FVB/N mice and in regions of spontaneous MC loss.** (A) Quantification of 4A; MC cell numbers per scale:interscale unit (MCs/mm<sup>2</sup>) in tail epidermis from 3-months old wild-type C57BL/6 and FVB/N mice.  $n=3$ ; \*\*\*\*:  $p<0.0001$  (scale IFE, C57BL/6 vs. FVB/N); ns:  $p=0.1173$  (interscale IFE, C57BL/6 vs. FVB/N); mean $\pm$ s.d.; one-way ANOVA/Tukey's multiple comparisons test. Data for C57BL/6 as shown in Figure 1F. (B) Quantification of 4A; LC cell numbers per scale:interscale unit (LCs/mm<sup>2</sup>) in tail epidermis from 3-months old wild-type C57BL/6 and FVB/N mice.  $n=3$ ; ns:  $p=0.9875$  (scale IFE, C57BL/6 vs. FVB/N); ns:  $p=0.2228$  (interscale IFE, C57BL/6 vs. FVB/N); mean $\pm$ s.d.; one-way ANOVA/Tukey's multiple comparisons test. Data for C57BL/6 as shown in Figure 1G. (C) Quantification of 4B; DETC cell numbers per scale:interscale unit (DETCs/mm<sup>2</sup>) in tail epidermis from 3-months old wild-type C57BL/6 and FVB/N mice.  $n=3$ ; ns:  $p=0.9944$  (scale IFE, C57BL/6 vs. FVB/N); \*\*:  $p=0.0032$  (interscale IFE, C57BL/6 vs. FVB/N); mean $\pm$ s.d.; one-way ANOVA/Tukey's multiple comparisons test. Data for C57BL/6 as shown in Figure 1H. (D) Quantification of 4G; LC cell numbers per scale:interscale unit (LCs/mm<sup>2</sup>) in tail epidermis from 3-months old wild-type C57BL/6 mice with spontaneous loss of MCs in posterior tail epidermis.  $n=4$ ; ns:  $p>0.9999$  (scale IFE, Ctrl vs. MC-free area); ns:  $p=0.9975$  (interscale IFE, Ctrl vs. MC-free area); mean $\pm$ s.d.; one-way ANOVA/Tukey's multiple comparisons test. (E) Quantification of 4H; DETC cell numbers per scale:interscale unit (DETCs/mm<sup>2</sup>) in tail epidermis from 3-months old wild-type C57BL/6 mice with spontaneous loss of MCs in posterior tail epidermis.  $n=3$ ; ns:  $p=0.9998$  (scale IFE, Ctrl vs. MC-free area); ns:  $p=0.5202$  (interscale IFE, Ctrl vs. MC-free area); mean $\pm$ s.d.; one-way ANOVA/Tukey's multiple comparisons test.

## Baess et al. Figure S4

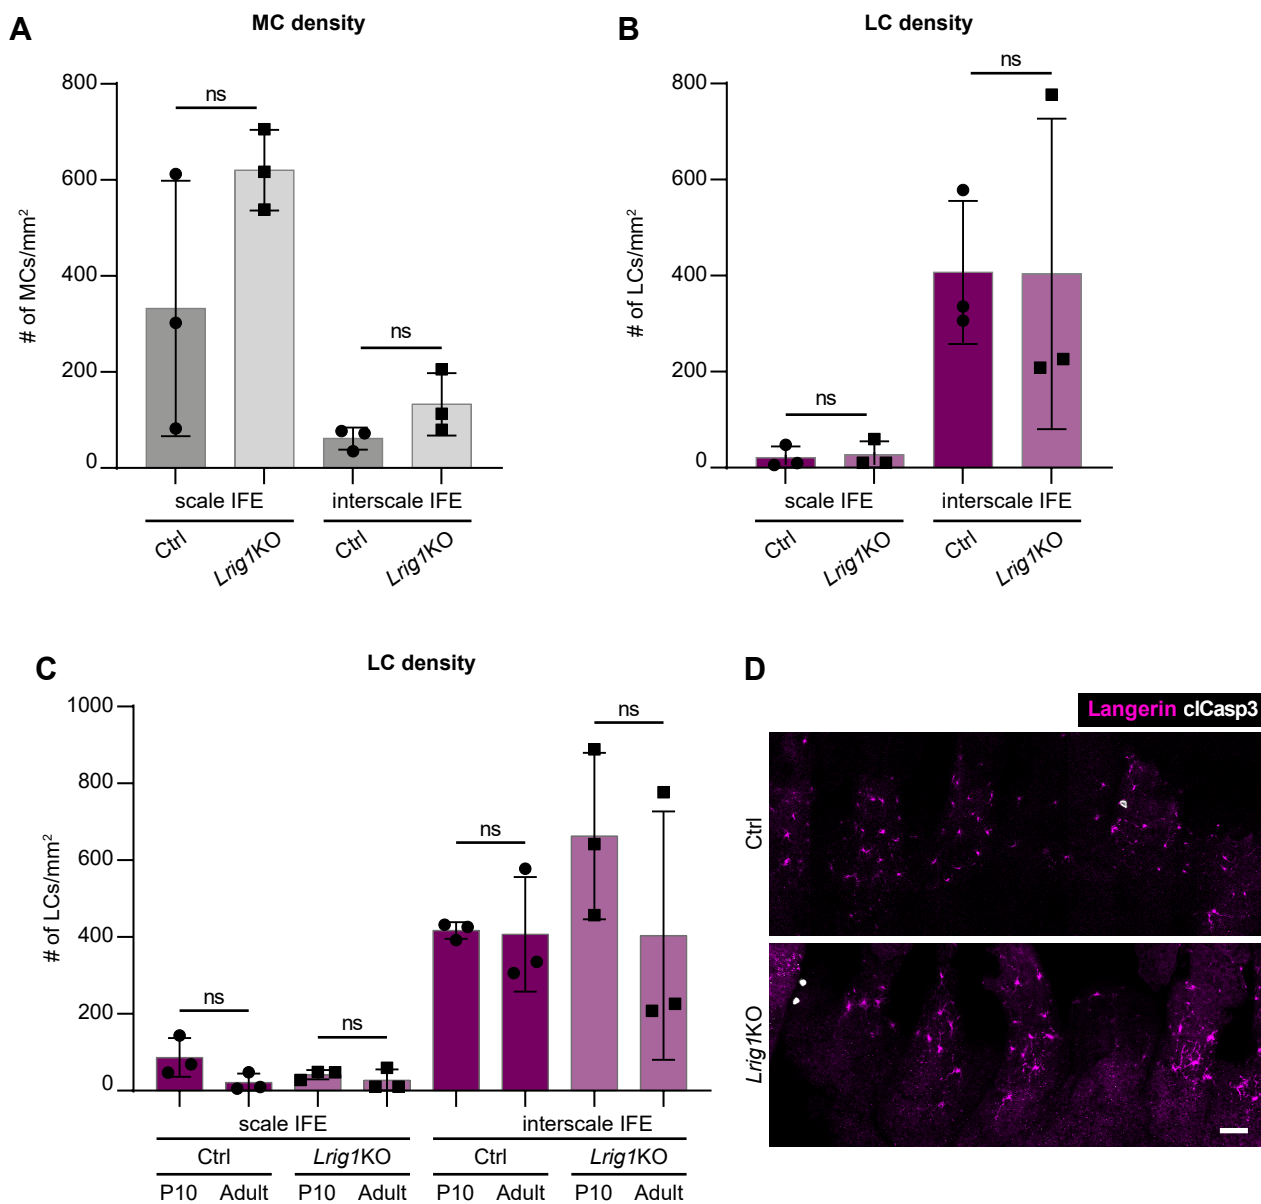

**Fig. S4. Analysis of resident cell types in *Lrig1KO* mice.** (A) Quantification of 5A; MC cell numbers per scale:interscale unit (MCs/mm<sup>2</sup>) in tail epidermis from 3-months old control and *Lrig1KO* mice. n=3; ns: p=0.1435 (scale IFE, Ctrl vs. *Lrig1KO*); ns: p=0.9269 (interscale IFE, Ctrl vs. *Lrig1KO*); mean±s.d.; one-way ANOVA/Tukey's multiple comparisons test. (B) Quantification of 5A; LC cell numbers per scale:interscale unit (LCs/mm<sup>2</sup>) in tail epidermis from 3-months old control and *Lrig1KO* mice. n=3; ns: p>0.9999 (scale IFE, Ctrl vs. *Lrig1KO*); ns: p>0.9999 (interscale IFE, Ctrl vs. *Lrig1KO*); mean±s.d.; one-way ANOVA/Tukey's multiple comparisons test. (C) LC cell numbers per scale:interscale unit (LCs/mm<sup>2</sup>) in tail epidermis from P10 and 3-months old control and *Lrig1KO* mice (data set of 3-months old mice also shown in B, here compared to younger mice). n=3; ns: p=0.9992 (scale IFE, Ctrl P10 vs. Ctrl Adult); ns: p>0.9999 (scale IFE, *Lrig1KO* P10 vs. *Lrig1KO* Adult); ns: p>0.9999 (interscale IFE, Ctrl P10 vs. Ctrl Adult); ns: p=0.4413 (interscale IFE, *Lrig1KO* P10 vs. *Lrig1KO* Adult); mean±s.d.; one-way ANOVA/Tukey's multiple comparisons test. (D) Langerin and cleaved Caspase3 immunostaining of tail epidermis whole-mounts from 3-months old control and *Lrig1KO* mice. Representative for n=3. Scale bar: 100 μm.

Baess et al. Figure S5

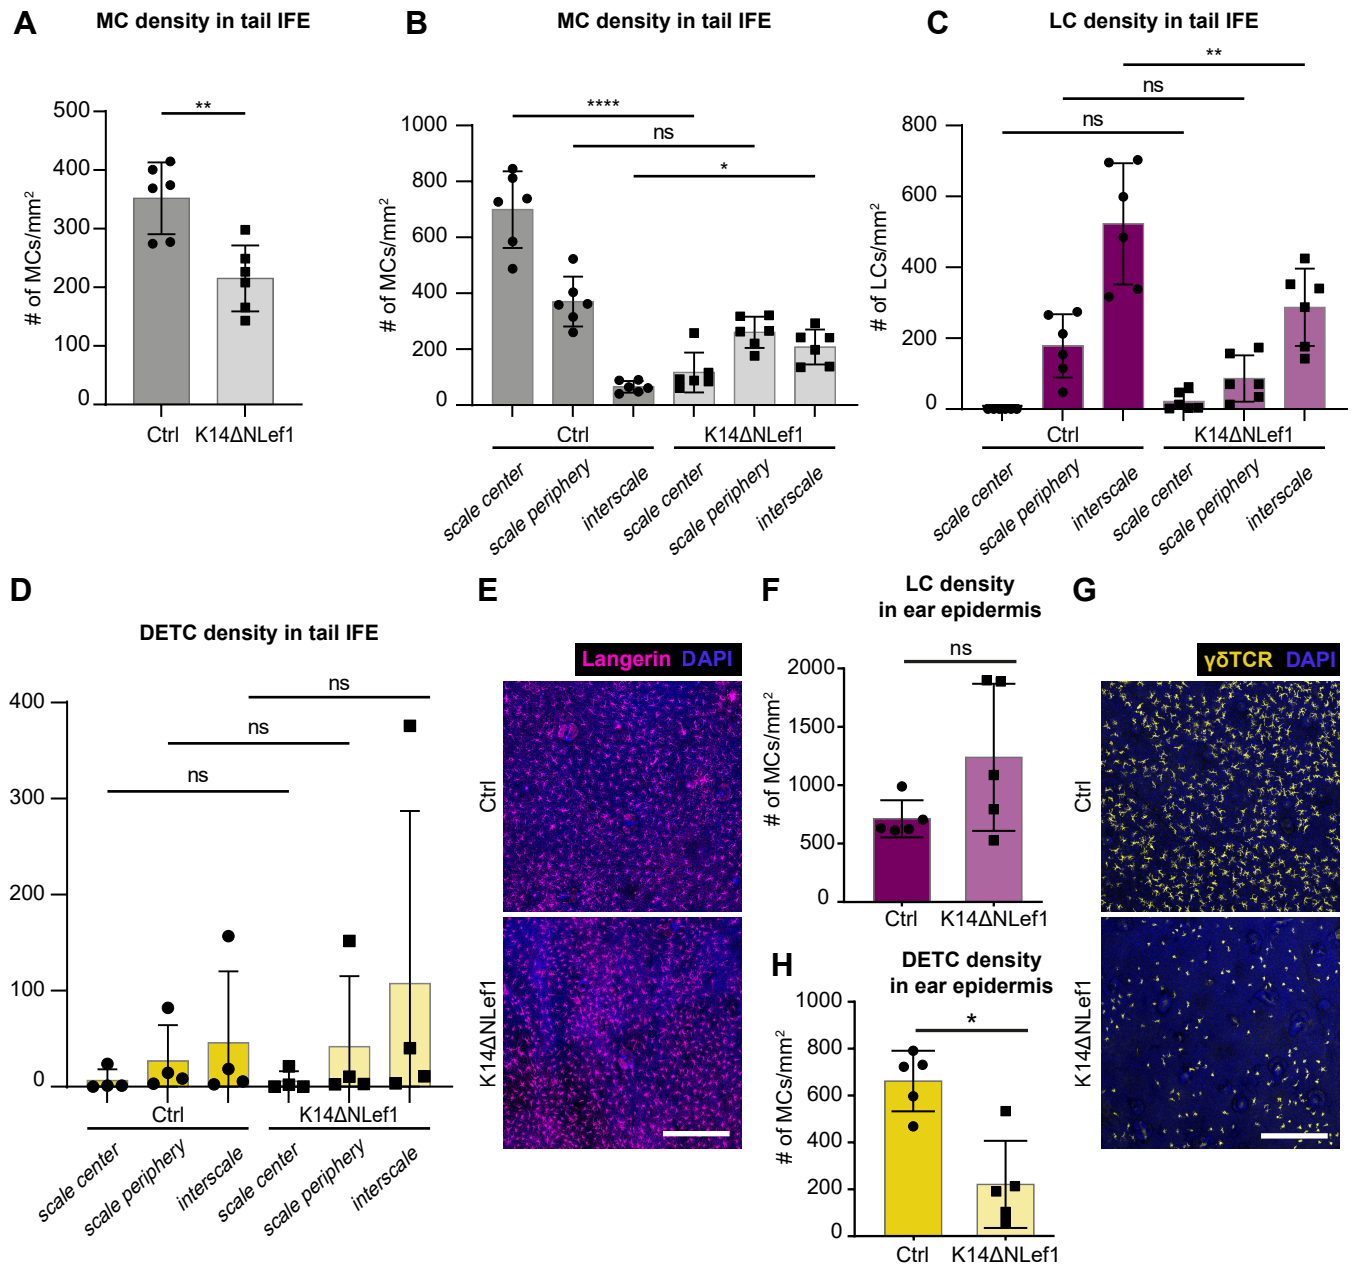

**Fig. S5. Analysis of resident cell types in K14ΔNLeF1 tail and ear IFE.** (A) Quantification of 6A; MC cell numbers (MCs/mm<sup>2</sup>) in tail epidermis from 3-months old control and K14ΔNLeF1 mice. n=6; \*\*: p=0.0087; mean±s.d.; Mann-Whitney test. (B) Quantification of 6A; MC cell numbers per scale:interscale unit (MCs/mm<sup>2</sup>) in tail epidermis from 3-months old control and K14ΔNLeF1 mice. n=6; \*\*\*\*: p<0.0001 (scale center, Ctrl vs. K14ΔNLeF1); ns: p=0.2070 (scale periphery, Ctrl vs. K14ΔNLeF1); \*: p=0.0497 (interscale IFE, Ctrl vs. K14ΔNLeF1); mean±s.d.; one-way ANOVA/Tukey's multiple comparisons test. (C) Quantification of 6A; LC cell numbers per scale:interscale unit (LCs/mm<sup>2</sup>) in tail epidermis from 3-months old control and K14ΔNLeF1 mice. n=6; ns: p=0.9986 (scale center, Ctrl vs. K14ΔNLeF1); ns: p=0.5590 (scale periphery, Ctrl vs. K14ΔNLeF1); \*\*: p=0.0021 (interscale IFE, Ctrl vs. K14ΔNLeF1); mean±s.d.; one-way ANOVA/Tukey's multiple comparisons test. (D) Quantification of 6B; DETC cell numbers per scale:interscale unit (DETCs/mm<sup>2</sup>) in tail epidermis from 3-months old control and K14ΔNLeF1 mice. n=4; ns: p>0.9999 (scale center, Ctrl vs. K14ΔNLeF1); ns: p>0.9999 (scale periphery, Ctrl vs. K14ΔNLeF1); ns: p=0.8852 (interscale IFE, Ctrl vs. K14ΔNLeF1); mean±s.d.; one-way ANOVA/Tukey's multiple comparisons test. (E) Langerin immunostaining of ear epidermis whole-mounts of 3-months old control and K14ΔNLeF1 mice. Nuclei were counterstained using DAPI. Scale bar: 250 μm. (F) Quantification of E; LC densities (number/mm<sup>2</sup>) in ear epidermis. n=5; ns: p=0.2222; mean ±s.d.; Mann-Whitney test. (G) γδTCR immunostaining of ear epidermis whole-mounts of 3-months old control and K14ΔNLeF1 mice. Nuclei were counterstained using DAPI. Scale bar: 250 μm. (H) Quantification of G; DETC densities (number/mm<sup>2</sup>) in ear epidermis. n=5; \*: p=0.0159; mean±s.d.; Mann-Whitney test.

Baess et al. Figure S6

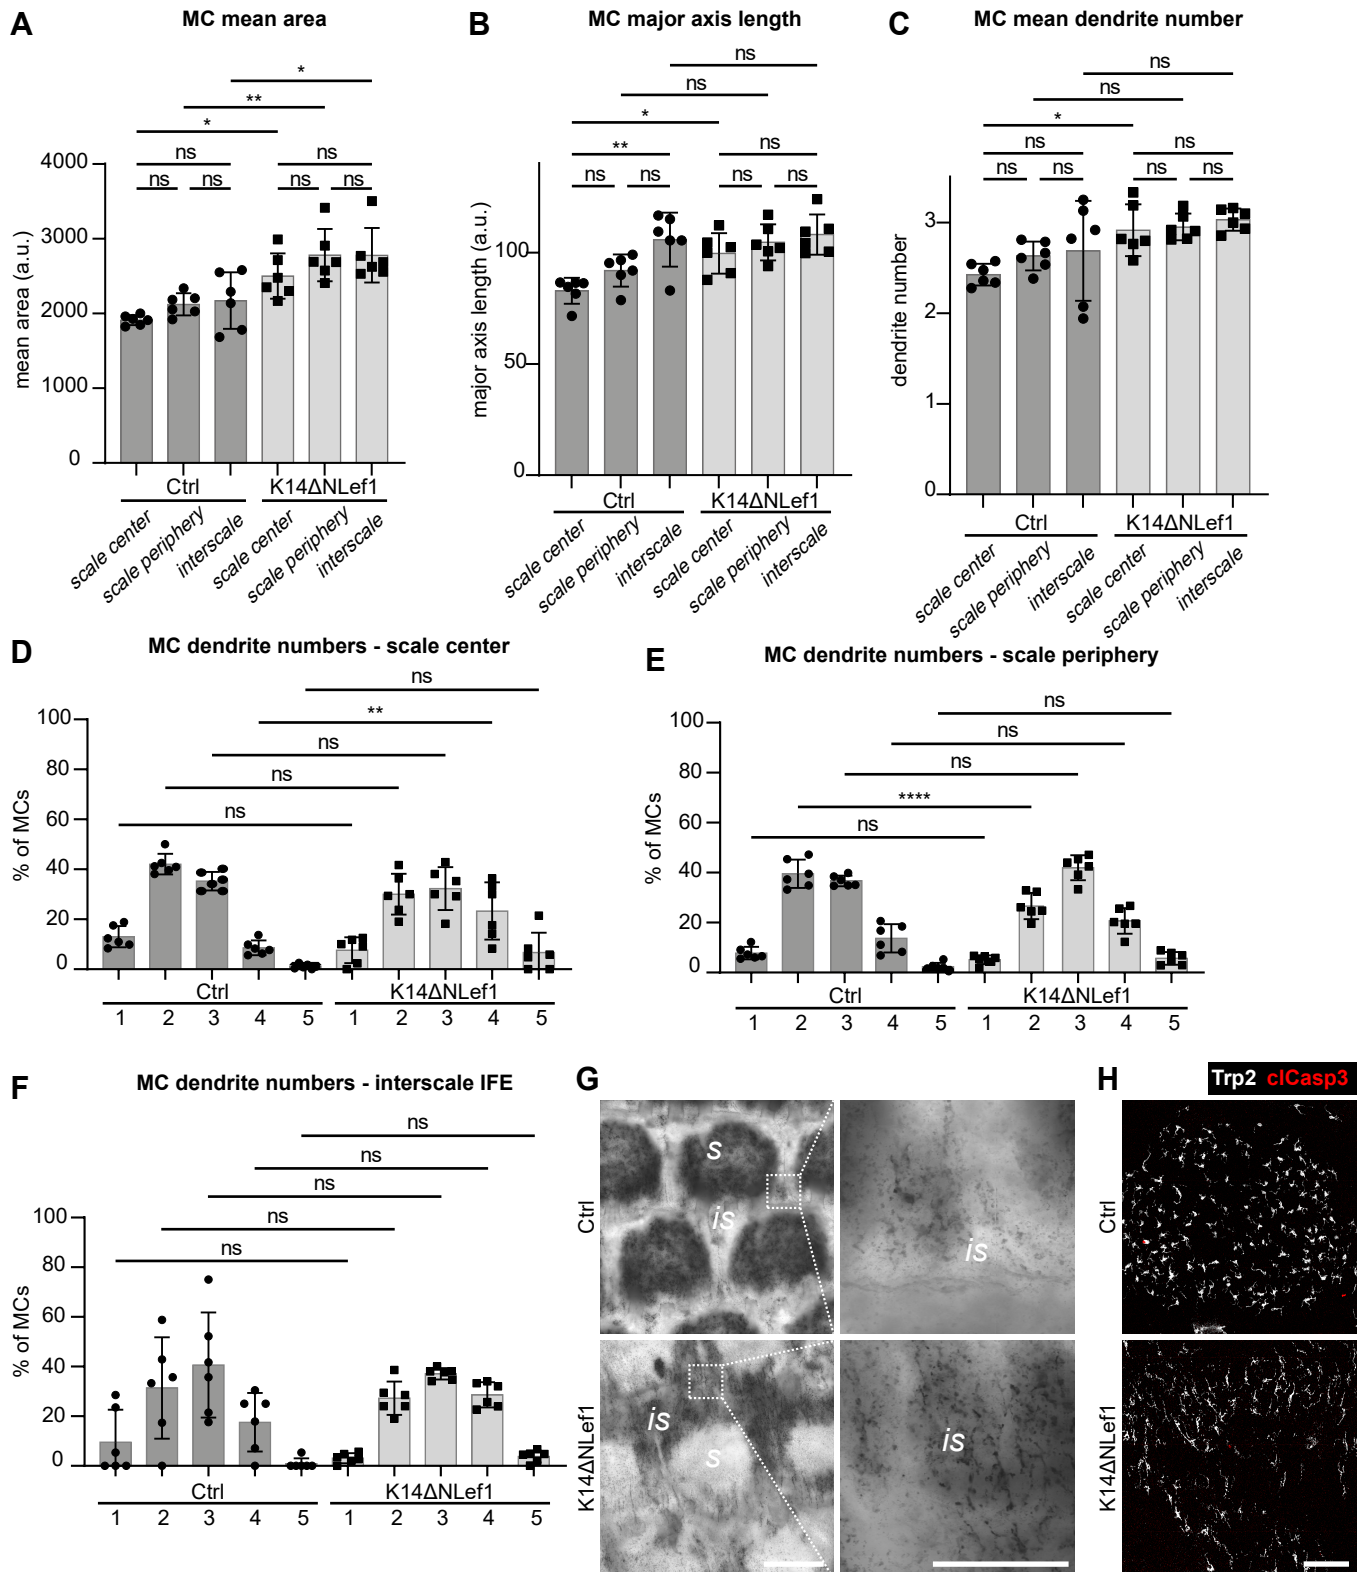



**Fig. S6. Analysis of MC properties in K14ΔNLeF1 tail IFE.** (A) Quantification of mean area per MC in tail IFE of 3-months old control and K14ΔNLeF1 mice. n=6; ns: p=0.8155 (Ctrl, scale center vs. scale periphery); ns: p=0.6484 (Ctrl, scale center vs. interscale IFE); ns: p=0.9997 (Ctrl, scale periphery vs. interscale IFE); ns: p=0.5756 (K14ΔNLeF1, scale center vs. scale periphery); ns: p=0.5801 (K14ΔNLeF1, scale center vs. interscale IFE); ns: p>0.9999 (K14ΔNLeF1, scale periphery vs. interscale IFE); \*: p=0.0180 (scale center, Ctrl vs. K14ΔNLeF1); \*\*: p=0.0064 (scale periphery, Ctrl vs. K14ΔNLeF1); \*: p=0.0137 (interscale IFE, Ctrl vs. K14ΔNLeF1); mean±s.d.; one-way ANOVA/Tukey's multiple comparisons test. (B) Quantification of major axis length per MC in tail IFE of 3-months old control and K14ΔNLeF1 mice. n=6; ns: p=0.4863 (Ctrl, scale center vs. scale periphery); \*\*: p=0.0011 (Ctrl, scale center vs. interscale IFE); ns: p=0.0971 (Ctrl, scale periphery vs. interscale IFE); ns: p=0.9185 (K14ΔNLeF1, scale center vs. scale periphery); ns: p=0.5608 (K14ΔNLeF1, scale center vs. interscale IFE); ns: p=0.9825 (K14ΔNLeF1, scale periphery vs. interscale IFE); \*: p=0.0270 (scale center, Ctrl vs. K14ΔNLeF1); ns: p=0.1156 (scale periphery, Ctrl vs. K14ΔNLeF1); ns: p=0.9975 (interscale IFE, Ctrl vs. K14ΔNLeF1); mean±s.d.; one-way ANOVA/Tukey's multiple comparisons test. (C) Quantification of mean dendrite number per MC in tail IFE of 3-months old control and K14ΔNLeF1 mice. n=6; ns: p=0.7946 (Ctrl, scale center vs. scale periphery); ns: p=0.5820 (Ctrl, scale center vs. interscale IFE); ns: p=0.9991 (Ctrl, scale periphery vs. interscale IFE); ns: p>0.9999 (K14ΔNLeF1, scale center vs. scale periphery); ns: p=0.9765 (K14ΔNLeF1, scale center vs. interscale IFE); ns: p=0.9957 (K14ΔNLeF1, scale periphery vs. interscale IFE); \*: p=0.0489 (scale center, Ctrl vs. K14ΔNLeF1); ns: p=0.3645 (scale periphery, Ctrl vs. K14ΔNLeF1); ns: p=0.2925 (interscale IFE, Ctrl vs. K14ΔNLeF1); mean±s.d.; one-way ANOVA/Tukey's multiple comparisons test. (D) Quantification of dendrite numbers (% of MCs) in tail IFE scale center compartment of 3-months old control and K14ΔNLeF1 mice. n=6; ns: p=0.9083 (1 dendrite, Ctrl vs. K14ΔNLeF1); ns: p=0.0635 (2 dendrites, Ctrl vs. K14ΔNLeF1); ns: p=0.9983 (3 dendrites, Ctrl vs. K14ΔNLeF1); \*\*: p=0.0087 (4 dendrites, Ctrl vs. K14ΔNLeF1); ns: p=0.8815 (5 dendrites, Ctrl vs. K14ΔNLeF1); mean±s.d.; one-way ANOVA/Tukey's multiple comparisons test. (E) Quantification of dendrite numbers (% of MCs) in tail IFE scale periphery compartment of 3-months old control and K14ΔNLeF1 mice. n=6; ns: p=0.9790 (1 dendrite, Ctrl vs. K14ΔNLeF1); \*\*\*\*: p<0.0001 (2 dendrites, Ctrl vs. K14ΔNLeF1); ns: p=0.4488 (3 dendrites, Ctrl vs. K14ΔNLeF1); ns: p=0.1162 (4 dendrites, Ctrl vs. K14ΔNLeF1); ns: p=0.9074 (5 dendrites, Ctrl vs. K14ΔNLeF1); mean±s.d.; one-way ANOVA/Tukey's multiple comparisons test. (F) Quantification of dendrite numbers (% of MCs) in tail IFE interscale compartment of 3-months old control and K14ΔNLeF1 mice. n=6; ns: p=0.9910 (1 dendrite, Ctrl vs. K14ΔNLeF1); ns: p=0.9998 (2 dendrites, Ctrl vs. K14ΔNLeF1); ns: p>0.9999 (3 dendrites, Ctrl vs. K14ΔNLeF1); ns: p=0.7885 (4 dendrites, Ctrl vs. K14ΔNLeF1); ns: p>0.9999 (5 dendrites, Ctrl vs. K14ΔNLeF1); mean±s.d.; one-way ANOVA/Tukey's multiple comparisons test. (G) Representative micrographs of Fontana-Masson staining in tail epidermis whole-mounts of 3-months old Ctrl and K14ΔNLeF1 mice. Representative for n=3. Scale bars: 300 μm (left), 100 μm (right). (H) Langerin and cleaved Caspase3 immunostaining of tail epidermis whole-mounts from 3-months old control and K14ΔNLeF1 mice. Representative for n=3. Scale bar: 100 μm. s: scale, is: interscale.

**Table S1. Antibodies and imaging reagents used in this study**

| <b>Primary antibodies</b>                       |                    |                   |                  |                 |
|-------------------------------------------------|--------------------|-------------------|------------------|-----------------|
| <b>antibody (supplier)</b>                      | <b>catalog nr.</b> | <b>clone/Ref.</b> | <b>species</b>   | <b>dilution</b> |
| K31 (Progen)                                    | GP-HHA1            | polyclonal        | guinea pig       | IF 1:100        |
| Trp2 (Santa Cruz Biotechnology)                 | sc-10451           | polyclonal        | goat             | IF 1:100        |
| Langerin (Invitrogen)                           | 14-2073-80         | eBioRMUL.2        | rat              | IF 1:100        |
| MHC II (M. Pasparakis lab, CECAD, Cologne)      | -                  | -                 | rat              | IF 1:100        |
| CD45 (Invitrogen)                               | 14-0451-82         | 30-F11            | rat              | IF 1:100        |
| Cleaved caspase 3 (R&D Systems)                 | AF835              | -                 | rabbit           | IF 1:100        |
| <b>Secondary antibodies</b>                     |                    |                   |                  |                 |
| Goat anti-guinea pig AF488 (Invitrogen)         | A11073             | polyclonal        | goat             | IF 1:500        |
| Donkey anti-rat AF594 (Dianova)                 | 712-585-153        | polyclonal        | donkey           | IF 1:500        |
| Donkey anti-goat AF647 (Invitrogen)             | A21447             | polyclonal        | donkey           | IF 1:500        |
| Goat anti-rat AF647 (Invitrogen)                | A21247             | polyclonal        | goat             | IF 1:500        |
| Goat anti-rabbit AF568 (Invitrogen)             | A11036             | polyclonal        | goat             | IF 1:500        |
| Donkey anti-goat AF594 (Invitrogen)             | A11058             | polyclonal        | donkey           | IF 1:500        |
| Donkey anti-rabbit AF488 (Invitrogen)           | A21206             | polyclonal        | donkey           | IF 1:500        |
| Goat anti-guinea pig AF568 (Invitrogen)         | A11075             | polyclonal        | goat             | IF 1:500        |
| <b>Other reagents</b>                           |                    |                   |                  |                 |
| DAPI (Carl Roth)                                | -                  | -                 | -                | IF 1:500        |
| Fontana-Masson staining kit (Sigma-Aldrich)     | HT200              | -                 | -                | -               |
| <b>Directly-conjugated antibodies</b>           |                    |                   |                  |                 |
| FITC anti-mouse TCR $\gamma/\delta$ (BioLegend) | 118105             | GL3               | Armenian hamster | IF 1:300        |
